# Supplementary material for: Screening Autoxidation Propensities of Drugs in the Solid-State Using PVP and in the Solution State Using N-Methyl Pyrrolidone
Source: MDPI journal article supplement (doi:10.3390/pharmaceutics15030848), 2023-03-05
Supplement: s1 [file s1]

# Supplementary Materials: Screening autoxidation propensities of drugs in the solid state using PVP and in the solution state using N-methyl pyrrolidone

Jayant Iyer<sup>1</sup>, Anjali Karn<sup>1</sup>, Michael Brunsteiner<sup>1</sup>, Andrew Ray<sup>3</sup>, Adrian Davis<sup>4</sup>, Isha Saraf<sup>1</sup> and Amrit Paudel<sup>1,2\*</sup>

**Table S1.** Chromatographic method conditions used in solid state autoxidation stress (RapidOxy<sup>®</sup>).

| Drug | Column                                              | Mobile Phase                                         | Method details (Time in minutes/%B organic)                                                                                                                                                                 | Flow rate (ml/min) | UV $\lambda_{max}$ (nm) | Injection volume ( $\mu$ L) | Column temperature ( $^{\circ}$ C) | Autosampler temperature ( $^{\circ}$ C) | Concentration of solution (mL <sup>-1</sup> ) | stress ( $\mu$ g) |
|------|-----------------------------------------------------|------------------------------------------------------|-------------------------------------------------------------------------------------------------------------------------------------------------------------------------------------------------------------|--------------------|-------------------------|-----------------------------|------------------------------------|-----------------------------------------|-----------------------------------------------|-------------------|
| DPD  | WATERS ACQUITY UPLC BEH C-8 (2.1mm*100mm) 1.7 $\mu$ | A: 10 mM AA and B: MeOH (100% v/v) pH 5.05           | T <sub>min</sub> /B%: T <sub>0.0</sub> /25; T <sub>2.0</sub> /25; T <sub>10.0</sub> /75; T <sub>12.0</sub> /90; T <sub>13.0</sub> /25; T <sub>15.0</sub> /25                                                | 0.350              | 235                     | 1                           | 40                                 | 25                                      | 500                                           |                   |
| MIF  | WATERS ACQUITY UPLC HSS T3 (2.1mm*100mm) 1.8 $\mu$  | A: 10 mM AF and B: ACN:MeOH 90:10 (100% v/v) pH 3.70 | T <sub>min</sub> /B%: T <sub>0.0</sub> /25; T <sub>1.0</sub> /25; T <sub>5.5</sub> /40; T <sub>8.5</sub> /40; T <sub>11.0</sub> /80; T <sub>12.0</sub> /80; T <sub>12.10</sub> /25; T <sub>15.0</sub> /25   | 0.350              | 305                     | 0.5                         | 30                                 | 10                                      | 500                                           |                   |
| CIM  | WATERS ACQUITY UPLC BEH C-8 (2.1mm*100mm) 1.7 $\mu$ | A: 10 mM AA and B: ACN (100% v/v) pH 9.02            | T <sub>min</sub> /B%: T <sub>0.0</sub> /5; T <sub>2.0</sub> /5; T <sub>6.0</sub> /10; T <sub>10.0</sub> /35; T <sub>12.00</sub> /5; T <sub>14.0</sub> /5                                                    | 0.250              | 225                     | 0.5                         | 30                                 | 25                                      | 500                                           |                   |
| NIF  | Agilent Poroshell eC-8 (100mm*3mm), 2.7 $\mu$       | A: 10 mM AF and B: MeOH (100% v/v) pH 4.1            | T <sub>min</sub> /B%: T <sub>0.0</sub> /20; T <sub>8.0</sub> /50; T <sub>15.0</sub> /90; T <sub>16</sub> /20; T <sub>18</sub> /20                                                                           | 0.400              | 235                     | 1                           | 40                                 | 15                                      | 250                                           |                   |
| IMC  | WATERS ACQUITY UPLC HSS T3 (2.1mm*100mm) 1.8 $\mu$  | A: 10 mM AF and B: ACN (100% v/v) pH 3.1             | T <sub>min</sub> /B%: T <sub>0.0</sub> /25; T <sub>1.0</sub> /25; T <sub>8.0</sub> /60; T <sub>9.0</sub> /70; T <sub>12.00</sub> /85; T <sub>13.00</sub> /85; T <sub>13.01</sub> /25; T <sub>15.0</sub> /25 | 0.325              | 230                     | 1                           | 30                                 | 20                                      | 250                                           |                   |
| NAP  | WATERS ACQUITY UPLC HSS T3                          | A: 10 mM AF and B: ACN (100% v/v) pH 3.1             | T <sub>min</sub> /B%: T <sub>0.0</sub> /25; T <sub>1.0</sub> /25; T <sub>8.0</sub> /60; T <sub>9.0</sub> /70; T <sub>12.00</sub> /85; T <sub>13.00</sub> /85; T <sub>13.01</sub> /25; T <sub>15.0</sub> /25 | 0.325              | 235                     | 0.5                         | 30                                 | 20                                      | 50                                            |                   |

|     |                                                  |                                                              |                                                                                                                                                                                                                   |       |     |     |    |    |     |  |
|-----|--------------------------------------------------|--------------------------------------------------------------|-------------------------------------------------------------------------------------------------------------------------------------------------------------------------------------------------------------------|-------|-----|-----|----|----|-----|--|
|     | (2.1mm*100mm)                                    |                                                              |                                                                                                                                                                                                                   |       |     |     |    |    |     |  |
|     | 1.8μ                                             |                                                              |                                                                                                                                                                                                                   |       |     |     |    |    |     |  |
| DIC | WATERS ACQUITY<br>UPLC HSS T3<br>(2.1mm*100mm)   | A: 10 mM AF and<br>B: ACN (100%<br>v/v) pH 3.1               | T <sub>min</sub> /B%: T <sub>0.0</sub> /25; T <sub>1.0</sub> /25;<br>T <sub>8.0</sub> /60; T <sub>9.0</sub> /70; T <sub>12.00</sub> /85;<br>T <sub>13.00</sub> /85; T <sub>13.01</sub> /25; T <sub>15.0</sub> /25 | 0.325 | 276 | 1   | 30 | 20 | 250 |  |
|     | 1.8μ                                             |                                                              |                                                                                                                                                                                                                   |       |     |     |    |    |     |  |
| OLA | WATERS ACQUITY<br>UPLC BEH C-18<br>(2.1mm*100mm) | A: 10 mM AA<br>and<br>B:ACN:MeOH(9<br>0:10% v/v) pH<br>5.61, | T <sub>min</sub> /B%: T <sub>0.0</sub> /10; T <sub>2.0</sub> /10;<br>T <sub>10.0</sub> /40; T <sub>14.0</sub> /80; T <sub>14.10</sub> /10;<br>T <sub>17.00</sub> /10                                              | 0.300 | 250 | 0.5 | 30 | 10 | 500 |  |
|     | 1.7μ                                             |                                                              |                                                                                                                                                                                                                   |       |     |     |    |    |     |  |
| CLO | WATERS ACQUITY<br>UPLC BEH C-8<br>(2.1mm*100mm)  | A: 10 mM AA<br>and B: ACN<br>(100% v/v) pH<br>9.02           | T <sub>min</sub> /B%: T <sub>0.0</sub> /20; T <sub>2.0</sub> /20;<br>T <sub>6.0</sub> /50; T <sub>10.0</sub> /80; T <sub>12.00</sub> /90;<br>T <sub>12.01</sub> /20; T <sub>15</sub> /20                          | 0.350 | 225 | 1   | 40 | 25 | 500 |  |
|     | 1.7μ                                             |                                                              |                                                                                                                                                                                                                   |       |     |     |    |    |     |  |

---

*Abbreviations: AF–Ammonium Formate, AA–Ammonium Acetate, MeOH–Methanol, ACN–Acetonitrile*

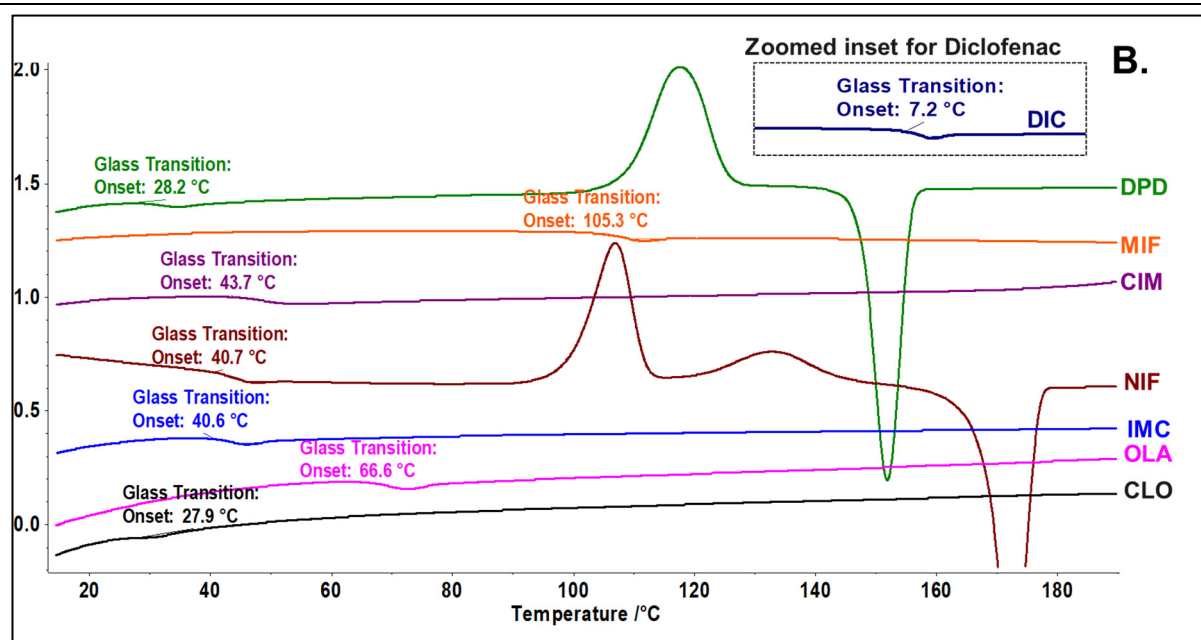

**Figure S1.** Experimental glass transition (onset) temperatures ( $T_g$ ) of selected compounds obtained in the 2<sup>nd</sup> heating scan by heat–cool–reheat cycle in DSC. Inset for DIC shows magnified  $T_g$  region. NAP sample recrystallized in the cooling run, thus is not reported here. (Exotherm points upwards)

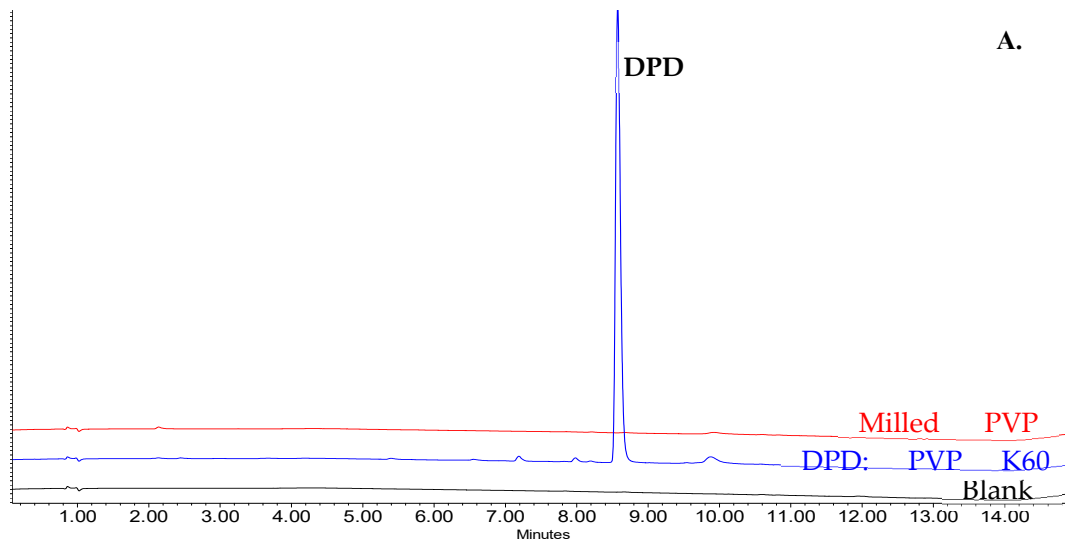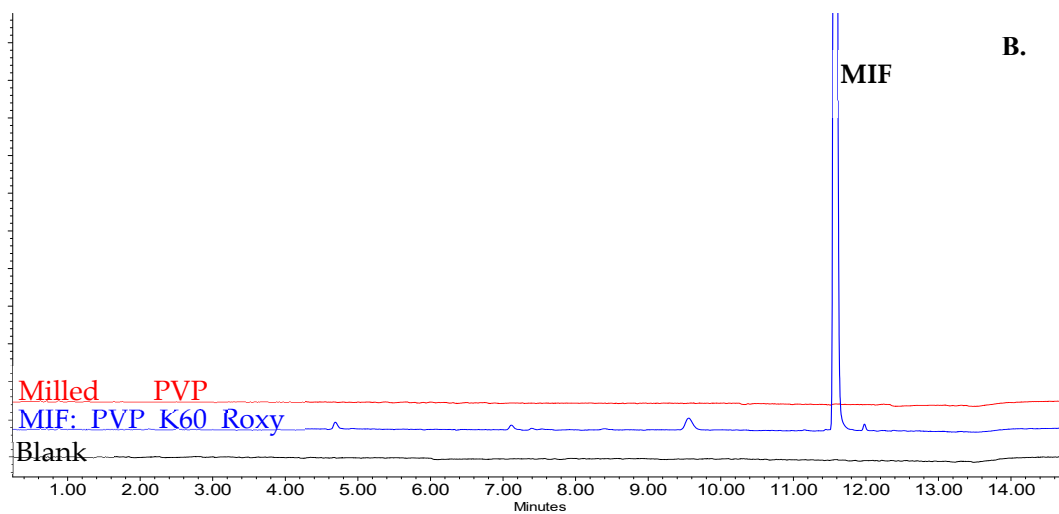

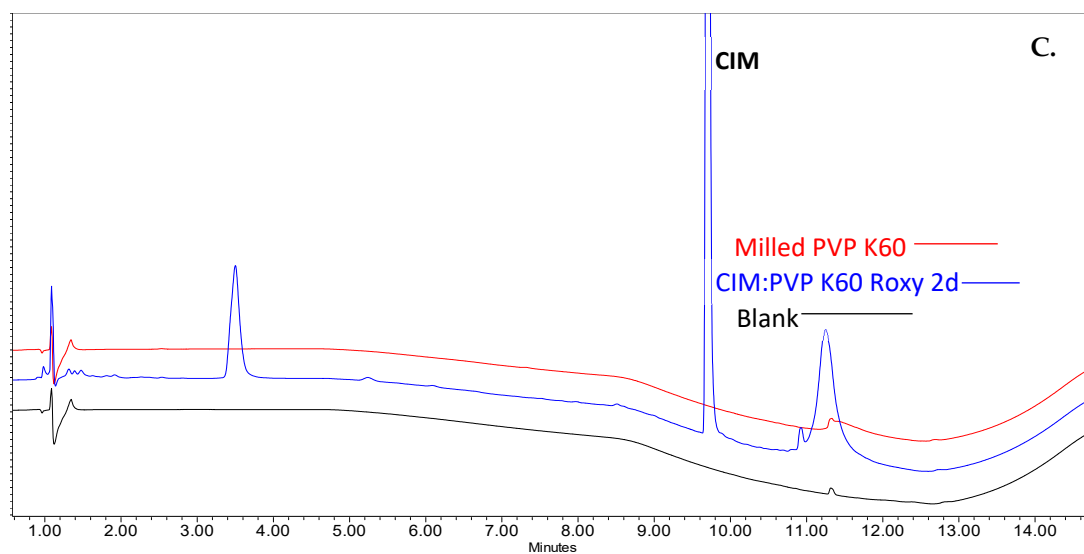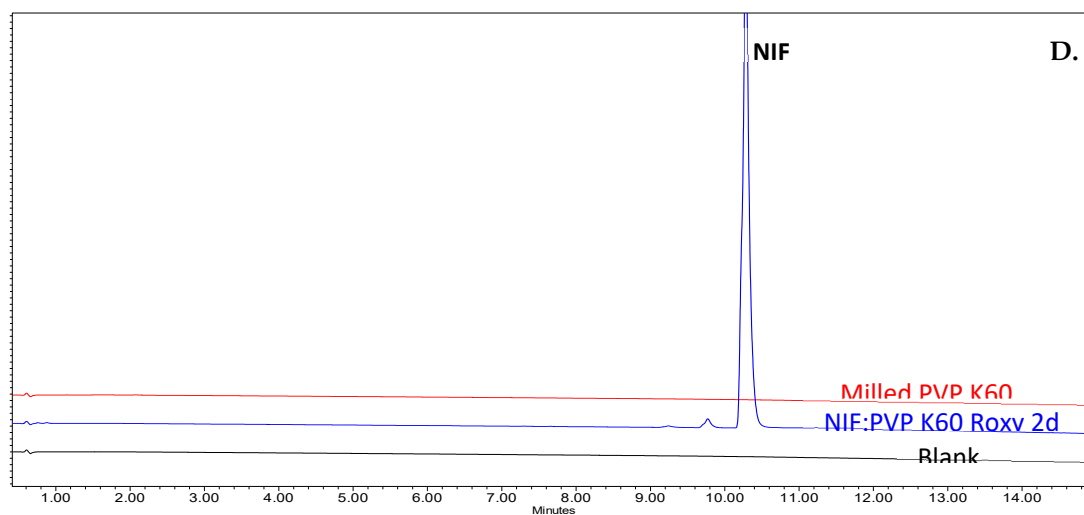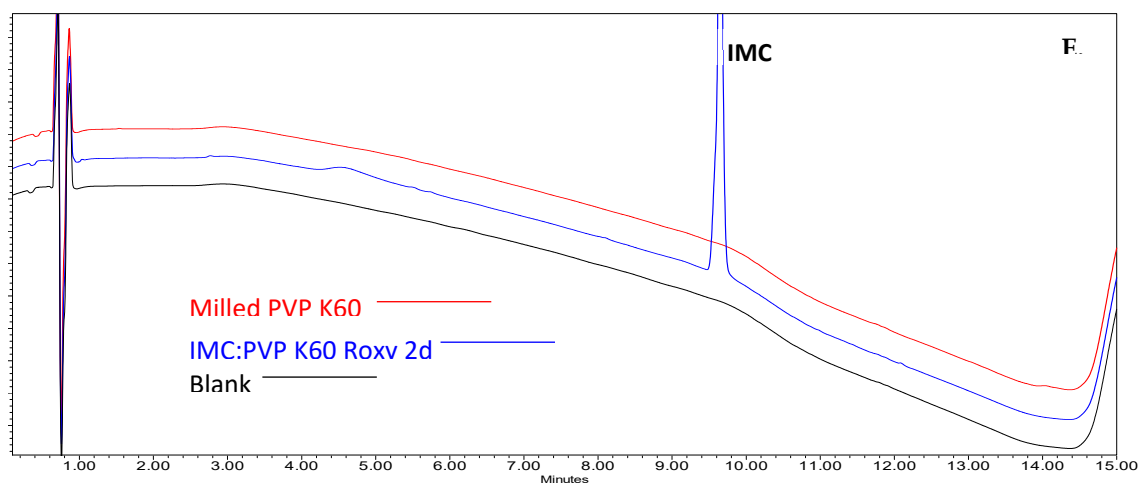

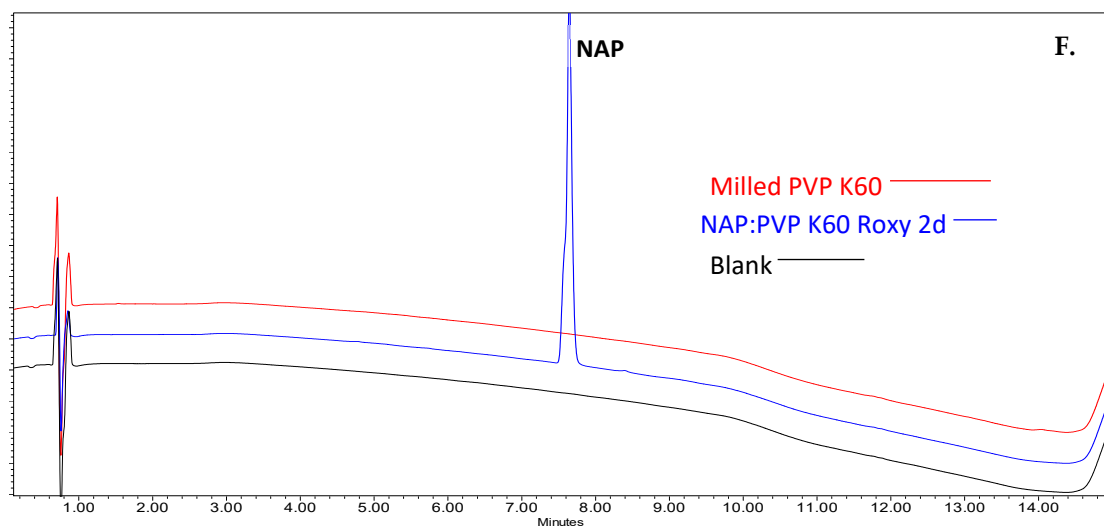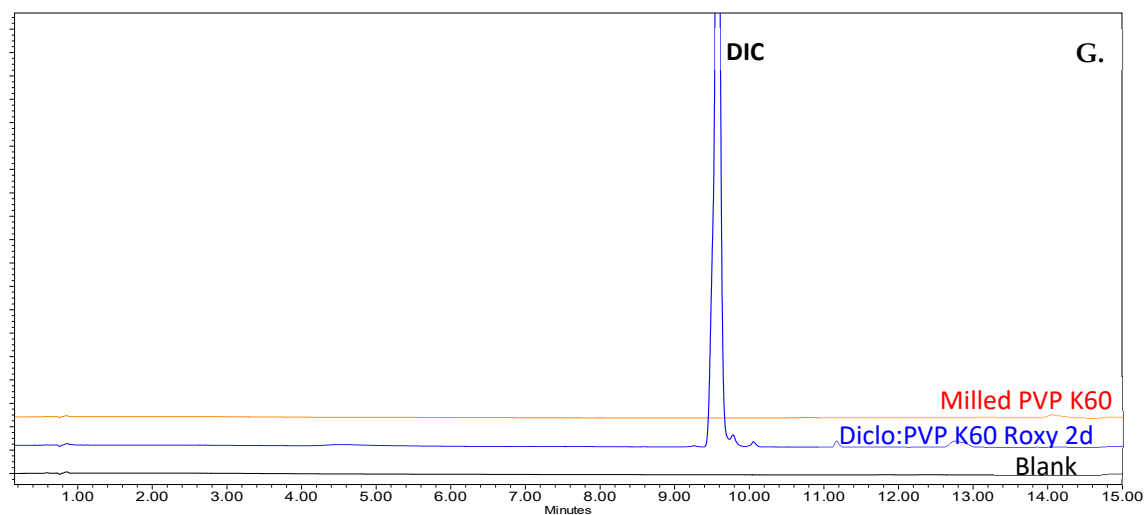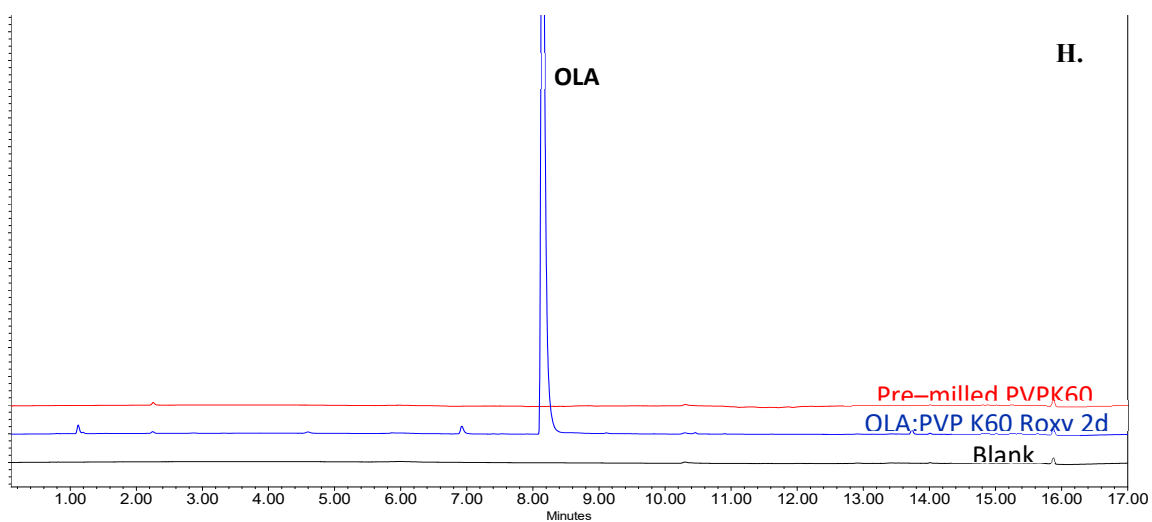

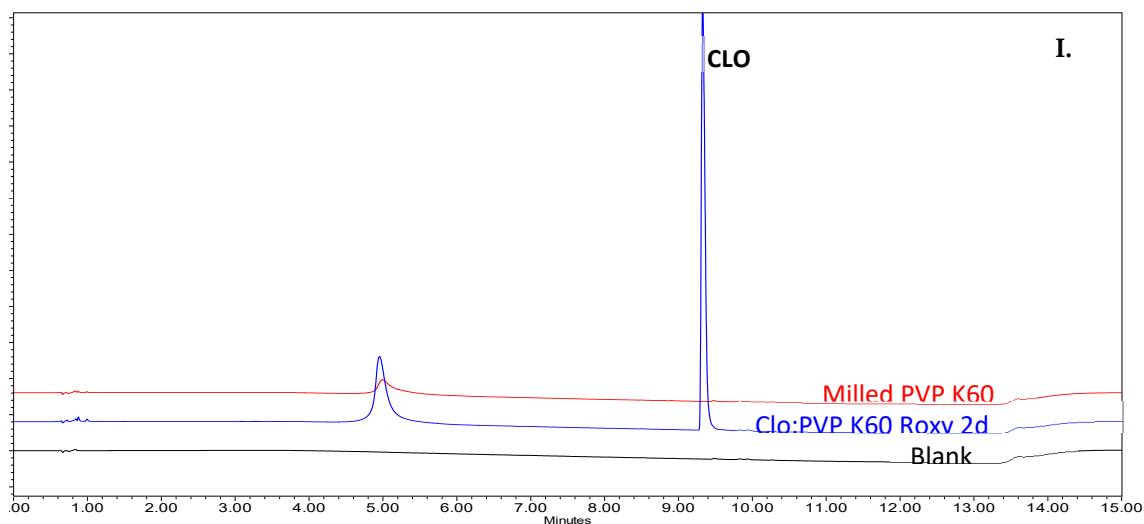

**Figure S2.**

Overlaid  
chromato-  
grams of  
solid state  
oxidation  
stress on  
the se-  
lected drug

candidates with pre-milled PVP K-60 (Roxv indicates RapidOxy®)

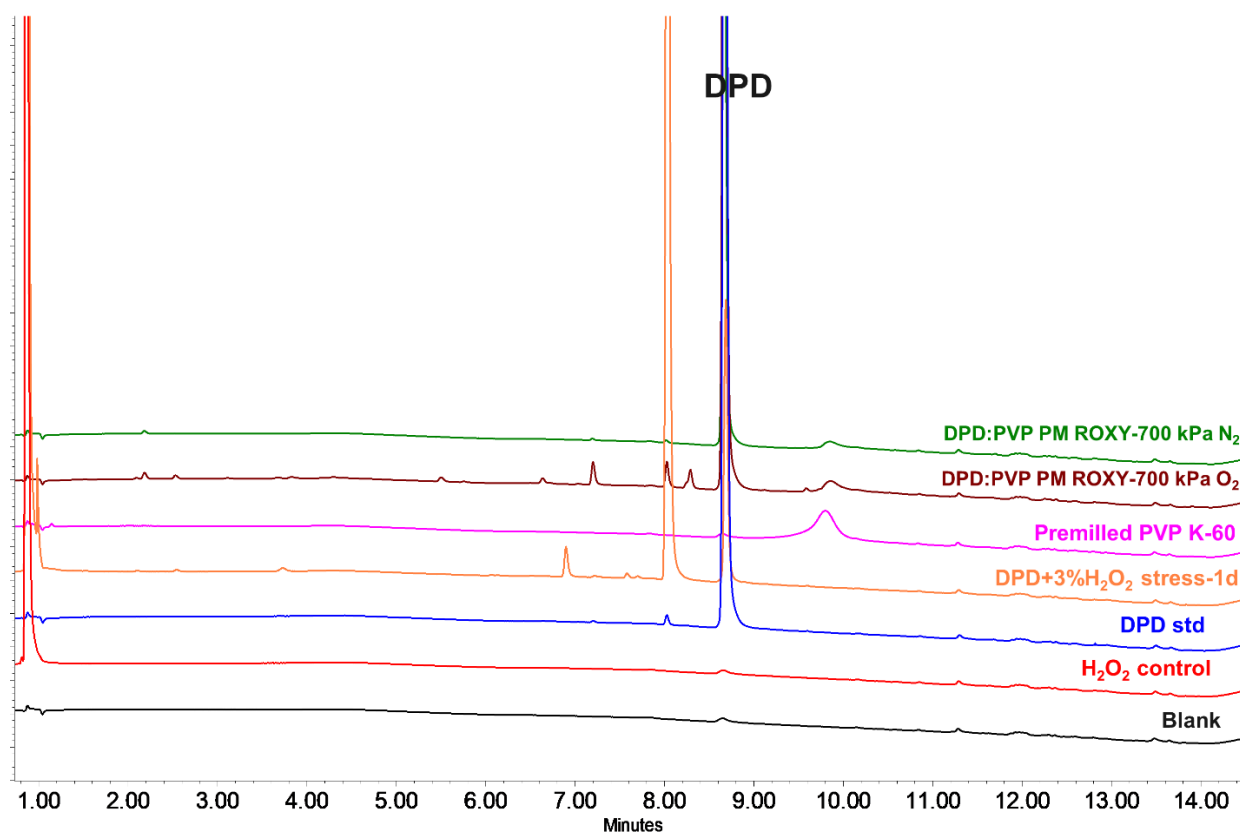

**Figure S3.** Control experiments under elevated nitrogen pressures (in RapidOxy®) and solution stress experiment using H<sub>2</sub>O<sub>2</sub>.

(std-standard; PM-physical mixture; ROXY-RapidOxy)

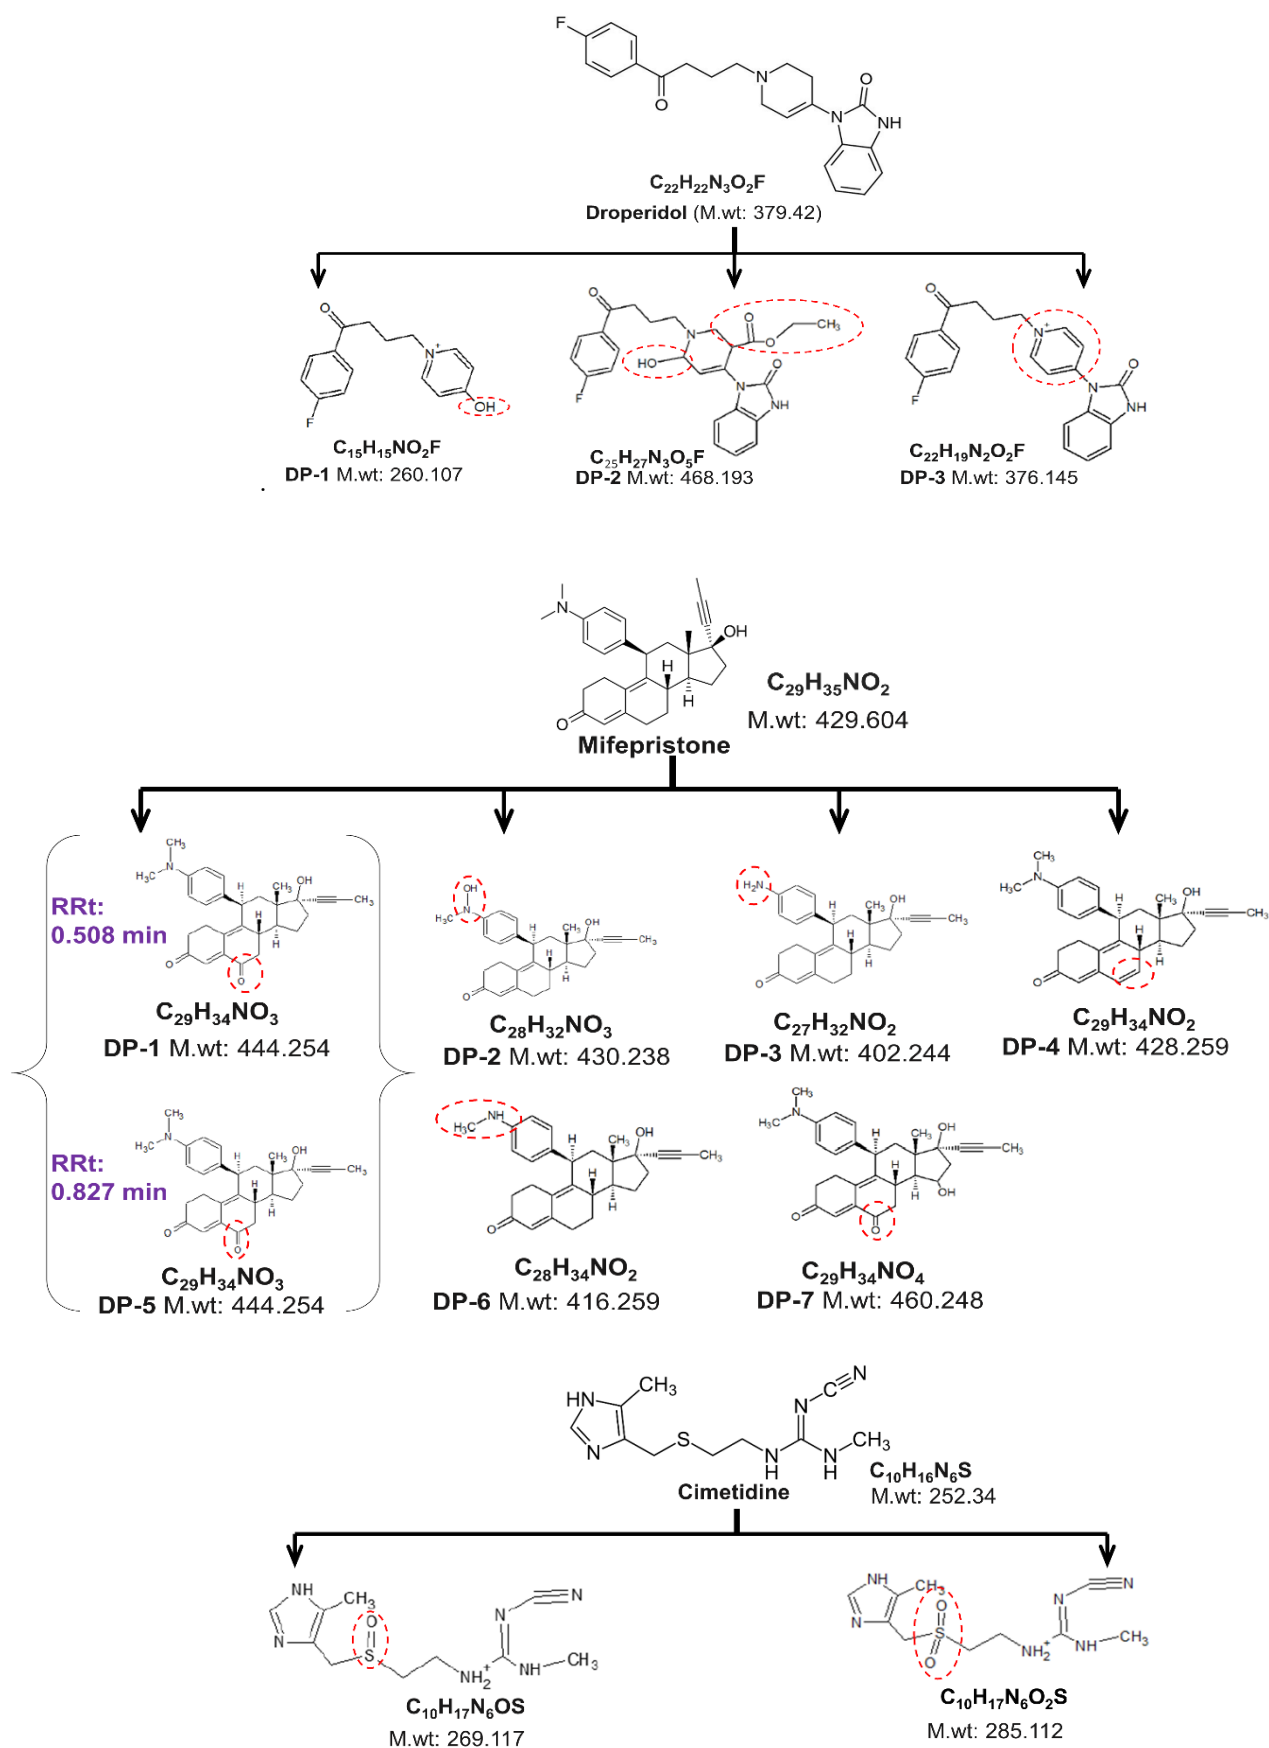

**Figure S4.** Structures of DPs formed in Drug:PVP PM (1:10) under RapidOxy<sup>®</sup> conditions as characterised by LC–MS analyses.



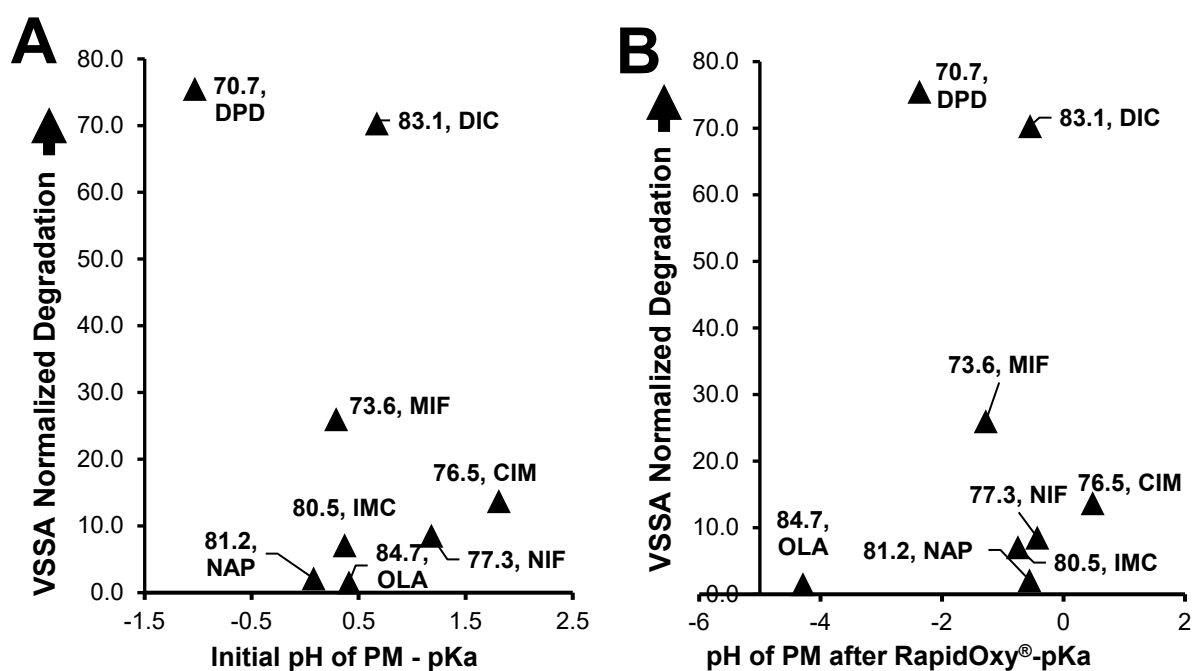

**Figure S5.** Comparison of extent of ionization (pH-pKa) and the VSSA normalized degradation in the solid state drug:premilled PVP K-60 (1:10) mixture before (A), and after RapidOxy® exposures (B). \*PM stands for Physical mixture and VSSA is the volume specific surface area.
